# Supplementary material for: UDP-Glucosyltransferases from Rice, Brachypodium, and Barley: Substrate Specificities and Synthesis of Type A and B Trichothecene-3-O-β-d-glucosides
Source: MDPI journal article supplement (doi:10.3390/toxins10030111), 2018-03-06
Supplement: s1 [file s1]

# Supplementary Materials: UDP-Glucosyltransferases from Rice, *Brachypodium* and Barley: Substrate Specificities and Synthesis of Type A and B Trichothecene-3-*O*- $\beta$ -D-glucosides

Herbert Michlmayr, Elisabeth Varga, Alexandra Malachová, Philipp Fruhmann, Marta Piątkowska, Christian Hametner, Jana Šofrová, Günther Jaunecker, Georg Häubl, Marc Lemmens, Franz Berthiller and Gerhard Adam

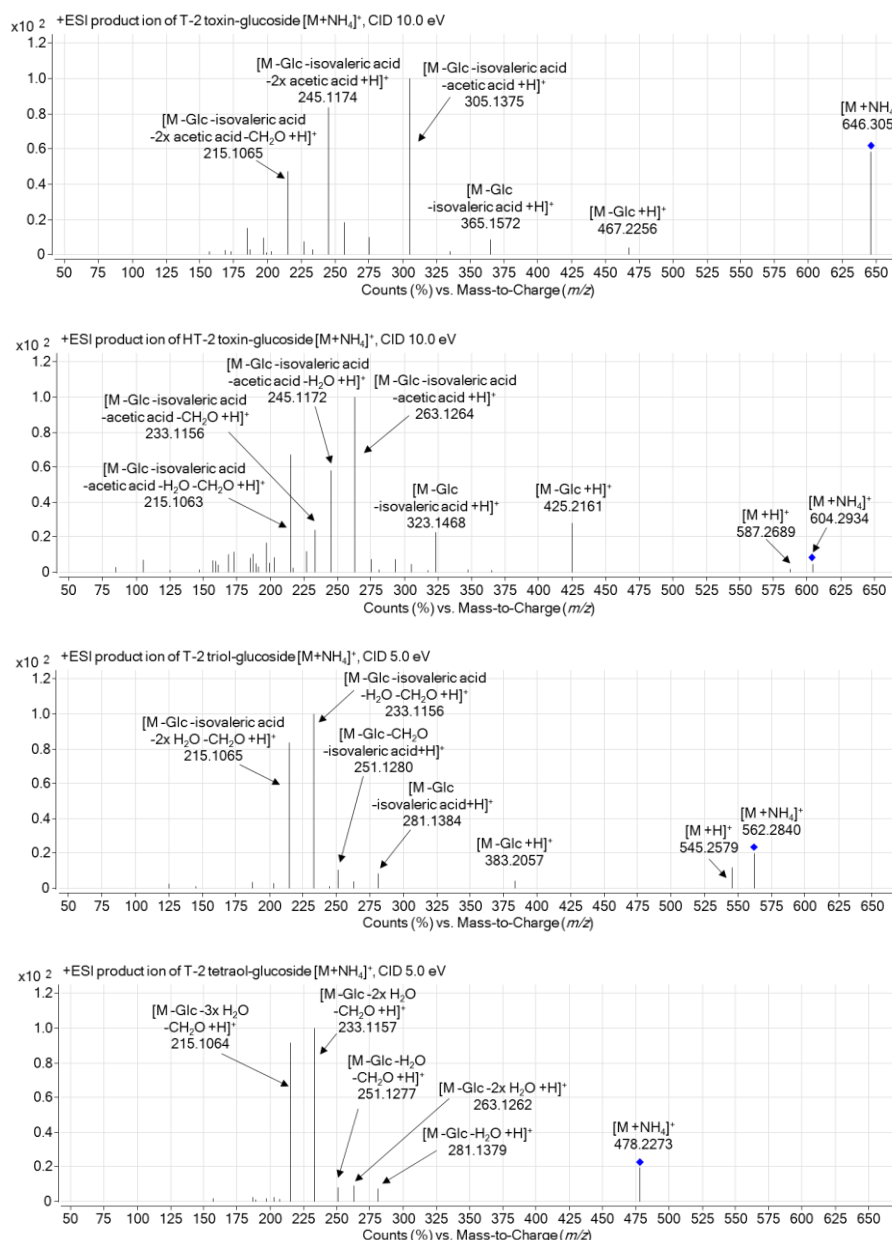

**Figure S1.** High resolution product ion spectra of the ammonium adduct of T-2 toxin-glucoside, HT-2 toxin-glucoside, T-2 triol-glucoside and T-2 tetraol-glucoside. Abbreviations: +ESI, positive electrospray ionization; CID, collision induced dissociation; Glc, glucose moiety.

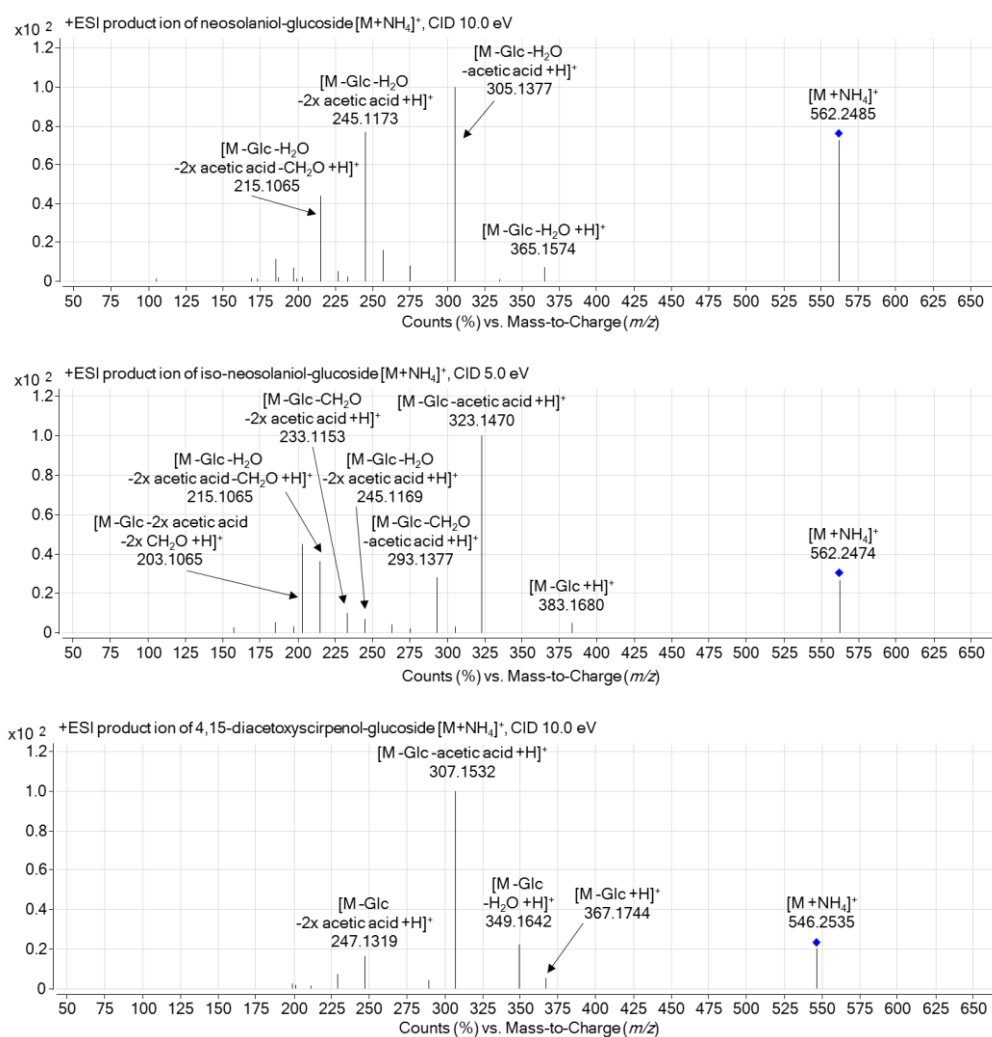

**Figure S2.** High resolution product ion spectra of the ammonium adduct of neosolaniol-glucoside, iso-neosolaniol-glucoside and 4,15-diacetoxyscirpenol-glucoside. Abbreviations: +ESI, positive electrospray ionization; CID, collision induced dissociation; Glc, glucose moiety

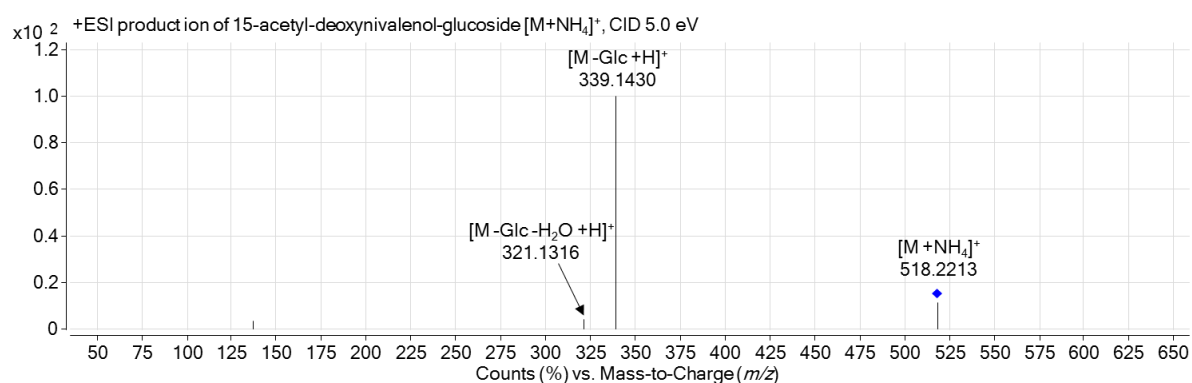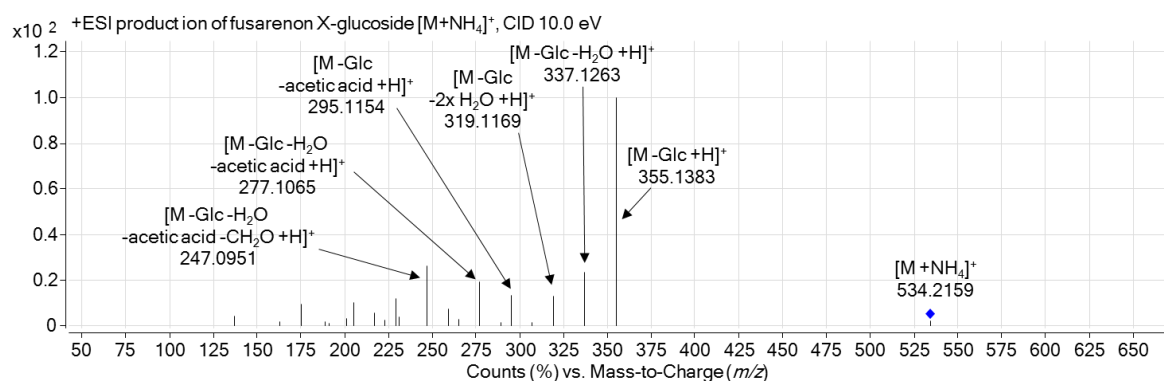

**Figure S3.** High resolution product ion spectra of the ammonium adduct of 15-acetyl-deoxynivalenol-glucoside and fusarenon X-glucoside. Abbreviations: +ESI, positive electrospray ionization; CID, collision induced dissociation; Glc, glucose moiety.

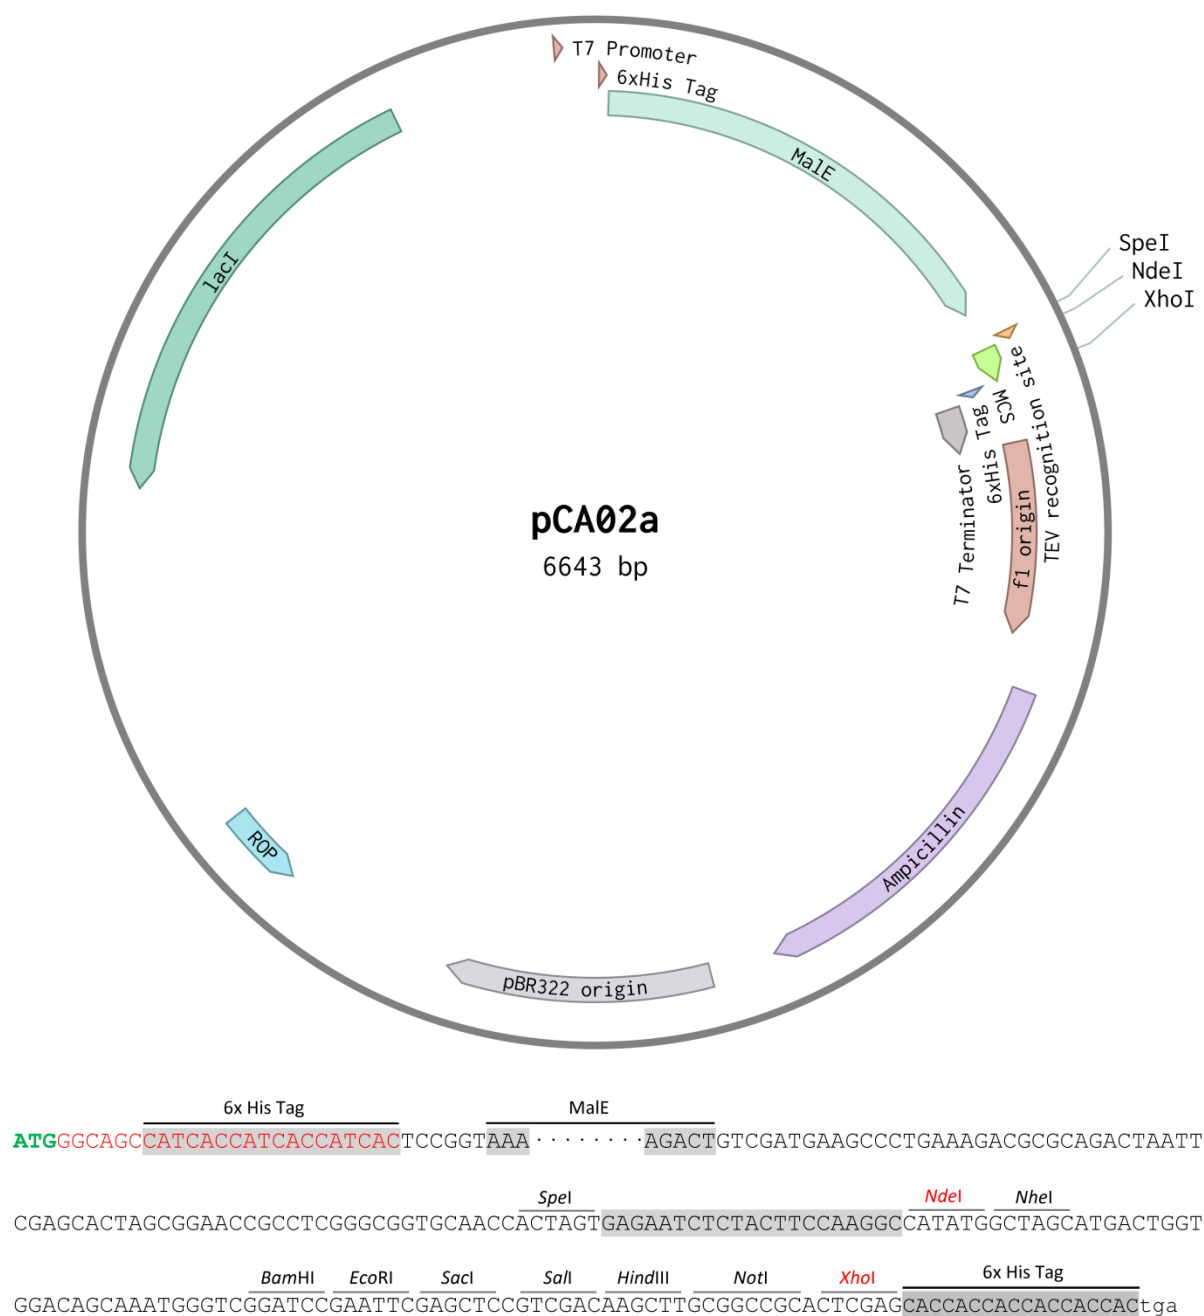

**Figure S4.** Topology of pCA02a/b. pCA02a is a derivative of pKLD116 [1] which in turn is a derivative of pET21a. pCA02a/pKLD116 are designed to express fusion proteins with N-terminal His<sub>6</sub>-tag, maltose binding protein (MalE gene), TEV recognition site and the C-terminal target protein. pCA02 contains the multiple cloning site of the pET21 vector series. In pCA02b, the N-terminal His-tag (red sequence) was eliminated, the C-terminal His<sub>6</sub>-tag is present in both pCA02a/b. The plasmid map was created with Benchling (<https://benchling.com/>).

## References

1. Rocco, C.; Dennison, K.; Klenchin, V.A.; Rayment, I.; Escalante-Semerena, J. Construction and use of new cloning vectors for the rapid isolation of recombinant proteins from *Escherichia coli*. *Plasmid* **2008**, *59*, 231-237.
